# Supplementary material for: Developing and evaluating communication strategies to support informed decisions and practice based on evidence (DECIDE): protocol and preliminary results
Source: Implement Sci. 2013 Jan 9;8:6. doi: 10.1186/1748-5908-8-6 (PMC3553065; doi:10.1186/1748-5908-8-6)
Supplement: Additional file 1 — Example framework from WP1. [file 1748-5908-8-6-S1.pdf]

**Should warfarin vs. aspirin therapy be used for patients with atrial fibrillation and intermediate risk of stroke (CHADS2=1)?**

**Population:** patients at intermediate risk of stroke (CHADS2 score of 1)

**Intervention:** warfarin

**Comparison:** aspirin

**Setting:** outpatients

|                          | JUDGEMENT                                                                                                                                                                                                                                                                                                                                                                                                                                                             | DETAILS OF JUDGEMENT                                                                                                                                                                                                                                                                                                                                                                                                                                                                                                                                                                                                                                                                                   | EVIDENCE/EXPLANATION                                                                                                                                                                                                                                                                                                                                                                                                                                                                                                                                                                                                                                                                                                                                                                                                                                                                                                                                                                                                                                                                                                 |                  |                                                   |                    |  |                             |                    |               |         |                                |       |         |         |                                  |                  |           |                   |        |         |                                    |                  |           |                          |         |        |                                  |                  |           |                   |        |        |                                  |                  |           |                     |                                                                                                                      |  |  |  |  |
|--------------------------|-----------------------------------------------------------------------------------------------------------------------------------------------------------------------------------------------------------------------------------------------------------------------------------------------------------------------------------------------------------------------------------------------------------------------------------------------------------------------|--------------------------------------------------------------------------------------------------------------------------------------------------------------------------------------------------------------------------------------------------------------------------------------------------------------------------------------------------------------------------------------------------------------------------------------------------------------------------------------------------------------------------------------------------------------------------------------------------------------------------------------------------------------------------------------------------------|----------------------------------------------------------------------------------------------------------------------------------------------------------------------------------------------------------------------------------------------------------------------------------------------------------------------------------------------------------------------------------------------------------------------------------------------------------------------------------------------------------------------------------------------------------------------------------------------------------------------------------------------------------------------------------------------------------------------------------------------------------------------------------------------------------------------------------------------------------------------------------------------------------------------------------------------------------------------------------------------------------------------------------------------------------------------------------------------------------------------|------------------|---------------------------------------------------|--------------------|--|-----------------------------|--------------------|---------------|---------|--------------------------------|-------|---------|---------|----------------------------------|------------------|-----------|-------------------|--------|---------|------------------------------------|------------------|-----------|--------------------------|---------|--------|----------------------------------|------------------|-----------|-------------------|--------|--------|----------------------------------|------------------|-----------|---------------------|----------------------------------------------------------------------------------------------------------------------|--|--|--|--|
| QUALITY                  | <p>What is the overall quality of evidence?</p> <div><input type="checkbox"/> High</div> <div><input checked="" type="checkbox"/> Moderate</div> <div><input type="checkbox"/> Low</div> <div><input type="checkbox"/> Very low</div>                                                                                                                                                                                                                                 | <p>Critical Outcomes:</p> <div><div>1. Death</div><div>High</div><div>Moderate</div><div>Low</div><div>Very low</div></div> <div><div>2. Non fatal strokes</div><div></div><div></div><div></div><div></div></div> <div><div>3. Non fatal extracranial major bleeds</div><div></div><div></div><div></div><div></div></div> <div><div>4. Systemic embolism</div><div></div><div></div><div></div><div></div></div> <div><div>5. Burden of treatment</div><div></div><div></div><div></div><div></div></div>                                                                                                                                                                                            | <ul style="list-style-type: none"><li>Imprecision was a reason for downgrading for nonfatal major bleeds, death and systemic embolisms</li></ul>                                                                                                                                                                                                                                                                                                                                                                                                                                                                                                                                                                                                                                                                                                                                                                                                                                                                                                                                                                     |                  |                                                   |                    |  |                             |                    |               |         |                                |       |         |         |                                  |                  |           |                   |        |         |                                    |                  |           |                          |         |        |                                  |                  |           |                   |        |        |                                  |                  |           |                     |                                                                                                                      |  |  |  |  |
| BENEFITS & HARMS         | <p>What is the balance between benefits and risks/ burden?</p> <p>Group:</p> <div><input type="checkbox"/> Benefits outweigh harms/ burden</div> <div><input checked="" type="checkbox"/> Benefits slightly outweigh harms/ burden</div> <div><input type="checkbox"/> Benefits and harms/ burden are balanced</div> <div><input type="checkbox"/> Harms/ burden slightly outweigh benefits</div> <div><input type="checkbox"/> Harms/ burden outweigh benefits</div> | <p>Critical Outcomes:</p> <div><div>Large/Mo dest benefit</div><div>Small benefit</div><div>No effect</div><div>Small ham/ burden</div><div>Modest/L arge harm/ burden</div></div> <div><div>1. Death</div><div></div><div></div><div></div><div></div><div></div></div> <div><div>2. Non fatal strokes</div><div></div><div></div><div></div><div></div><div></div></div> <div><div>3. Non fatal extracranial major bleeding</div><div></div><div></div><div></div><div></div><div></div></div> <div><div>4. Systemic embolism</div><div></div><div></div><div></div><div></div><div></div></div> <div><div>5. Burden of treatment</div><div></div><div></div><div></div><div></div><div></div></div> | <table><tr><th rowspan="2">Outcome</th><th colspan="3">Absolute estimates (95% CI)<br/>Time frame: 1 year</th><th rowspan="2">Relative estimates (95% CI)</th><th rowspan="2">Patients (studies)</th></tr><tr><th>Interventi on</th><th>Control</th><th>Difference (per 1000) (95% CI)</th></tr><tr><td>Death</td><td>46/1000</td><td>47/1000</td><td>1 fewer (from 7 fewer to 6 more)</td><td>0.97 (0.85-1.12)</td><td>5855 (10)</td></tr><tr><td>Non Fatal strokes</td><td>8/1000</td><td>17/1000</td><td>9 fewer (from 5 fewer to 11 fewer)</td><td>0.48 (0.33-0.70)</td><td>6526 (11)</td></tr><tr><td>Non fatal major bleeding</td><td>12/1000</td><td>8/1000</td><td>3 more (from 1 fewer to 10 more)</td><td>1.42 (0.49-2.29)</td><td>6526 (11)</td></tr><tr><td>Systemic embolism</td><td>2/1000</td><td>3/1000</td><td>1 fewer (from 2 fewer to 2 more)</td><td>0.81 (0.40-1.64)</td><td>6256 (11)</td></tr><tr><td>Burden of treatment</td><td colspan="4">The use of warfarin compared to aspirin increases the burden of treatment, due to the need of more frequent controls</td><td></td></tr></table> | Outcome          | Absolute estimates (95% CI)<br>Time frame: 1 year |                    |  | Relative estimates (95% CI) | Patients (studies) | Interventi on | Control | Difference (per 1000) (95% CI) | Death | 46/1000 | 47/1000 | 1 fewer (from 7 fewer to 6 more) | 0.97 (0.85-1.12) | 5855 (10) | Non Fatal strokes | 8/1000 | 17/1000 | 9 fewer (from 5 fewer to 11 fewer) | 0.48 (0.33-0.70) | 6526 (11) | Non fatal major bleeding | 12/1000 | 8/1000 | 3 more (from 1 fewer to 10 more) | 1.42 (0.49-2.29) | 6526 (11) | Systemic embolism | 2/1000 | 3/1000 | 1 fewer (from 2 fewer to 2 more) | 0.81 (0.40-1.64) | 6256 (11) | Burden of treatment | The use of warfarin compared to aspirin increases the burden of treatment, due to the need of more frequent controls |  |  |  |  |
| Outcome                  | Absolute estimates (95% CI)<br>Time frame: 1 year                                                                                                                                                                                                                                                                                                                                                                                                                     |                                                                                                                                                                                                                                                                                                                                                                                                                                                                                                                                                                                                                                                                                                        |                                                                                                                                                                                                                                                                                                                                                                                                                                                                                                                                                                                                                                                                                                                                                                                                                                                                                                                                                                                                                                                                                                                      |                  | Relative estimates (95% CI)                       | Patients (studies) |  |                             |                    |               |         |                                |       |         |         |                                  |                  |           |                   |        |         |                                    |                  |           |                          |         |        |                                  |                  |           |                   |        |        |                                  |                  |           |                     |                                                                                                                      |  |  |  |  |
|                          | Interventi on                                                                                                                                                                                                                                                                                                                                                                                                                                                         | Control                                                                                                                                                                                                                                                                                                                                                                                                                                                                                                                                                                                                                                                                                                | Difference (per 1000) (95% CI)                                                                                                                                                                                                                                                                                                                                                                                                                                                                                                                                                                                                                                                                                                                                                                                                                                                                                                                                                                                                                                                                                       |                  |                                                   |                    |  |                             |                    |               |         |                                |       |         |         |                                  |                  |           |                   |        |         |                                    |                  |           |                          |         |        |                                  |                  |           |                   |        |        |                                  |                  |           |                     |                                                                                                                      |  |  |  |  |
| Death                    | 46/1000                                                                                                                                                                                                                                                                                                                                                                                                                                                               | 47/1000                                                                                                                                                                                                                                                                                                                                                                                                                                                                                                                                                                                                                                                                                                | 1 fewer (from 7 fewer to 6 more)                                                                                                                                                                                                                                                                                                                                                                                                                                                                                                                                                                                                                                                                                                                                                                                                                                                                                                                                                                                                                                                                                     | 0.97 (0.85-1.12) | 5855 (10)                                         |                    |  |                             |                    |               |         |                                |       |         |         |                                  |                  |           |                   |        |         |                                    |                  |           |                          |         |        |                                  |                  |           |                   |        |        |                                  |                  |           |                     |                                                                                                                      |  |  |  |  |
| Non Fatal strokes        | 8/1000                                                                                                                                                                                                                                                                                                                                                                                                                                                                | 17/1000                                                                                                                                                                                                                                                                                                                                                                                                                                                                                                                                                                                                                                                                                                | 9 fewer (from 5 fewer to 11 fewer)                                                                                                                                                                                                                                                                                                                                                                                                                                                                                                                                                                                                                                                                                                                                                                                                                                                                                                                                                                                                                                                                                   | 0.48 (0.33-0.70) | 6526 (11)                                         |                    |  |                             |                    |               |         |                                |       |         |         |                                  |                  |           |                   |        |         |                                    |                  |           |                          |         |        |                                  |                  |           |                   |        |        |                                  |                  |           |                     |                                                                                                                      |  |  |  |  |
| Non fatal major bleeding | 12/1000                                                                                                                                                                                                                                                                                                                                                                                                                                                               | 8/1000                                                                                                                                                                                                                                                                                                                                                                                                                                                                                                                                                                                                                                                                                                 | 3 more (from 1 fewer to 10 more)                                                                                                                                                                                                                                                                                                                                                                                                                                                                                                                                                                                                                                                                                                                                                                                                                                                                                                                                                                                                                                                                                     | 1.42 (0.49-2.29) | 6526 (11)                                         |                    |  |                             |                    |               |         |                                |       |         |         |                                  |                  |           |                   |        |         |                                    |                  |           |                          |         |        |                                  |                  |           |                   |        |        |                                  |                  |           |                     |                                                                                                                      |  |  |  |  |
| Systemic embolism        | 2/1000                                                                                                                                                                                                                                                                                                                                                                                                                                                                | 3/1000                                                                                                                                                                                                                                                                                                                                                                                                                                                                                                                                                                                                                                                                                                 | 1 fewer (from 2 fewer to 2 more)                                                                                                                                                                                                                                                                                                                                                                                                                                                                                                                                                                                                                                                                                                                                                                                                                                                                                                                                                                                                                                                                                     | 0.81 (0.40-1.64) | 6256 (11)                                         |                    |  |                             |                    |               |         |                                |       |         |         |                                  |                  |           |                   |        |         |                                    |                  |           |                          |         |        |                                  |                  |           |                   |        |        |                                  |                  |           |                     |                                                                                                                      |  |  |  |  |
| Burden of treatment      | The use of warfarin compared to aspirin increases the burden of treatment, due to the need of more frequent controls                                                                                                                                                                                                                                                                                                                                                  |                                                                                                                                                                                                                                                                                                                                                                                                                                                                                                                                                                                                                                                                                                        |                                                                                                                                                                                                                                                                                                                                                                                                                                                                                                                                                                                                                                                                                                                                                                                                                                                                                                                                                                                                                                                                                                                      |                  |                                                   |                    |  |                             |                    |               |         |                                |       |         |         |                                  |                  |           |                   |        |         |                                    |                  |           |                          |         |        |                                  |                  |           |                   |        |        |                                  |                  |           |                     |                                                                                                                      |  |  |  |  |
| VALUES AND PREFERENCES   | <p>What are the patient's values and preferences, and what certainty do we have about them?</p> <div><input type="checkbox"/> Little unceirtany and similar values</div> <div><input checked="" type="checkbox"/> Some uncerntainty or some variation</div> <div><input type="checkbox"/> Significant uncerntainty or large variation</div>                                                                                                                           | <div><div>Agree</div><div>Somewhat agree</div><div>Uncertain</div><div>Somewhat disagree</div><div>Disagree</div></div> <div><div>High confidence in the tipical values</div><div></div><div></div><div></div><div></div><div></div></div> <div><div>Values and preferences likely similar</div><div></div><div></div><div></div><div></div><div></div></div>                                                                                                                                                                                                                                                                                                                                          | <ul style="list-style-type: none"><li>We are moderately confident that patients will place the greatest value on avoiding strokes. Our best estimate from a systematic review is that 1 stroke equals 1 major bleed. There is wide variability in these values and preferences. Patients averse to taking oral anticoagulants for their potential of bleeding may be reluctant to use long-term warfarin therapy.</li></ul>                                                                                                                                                                                                                                                                                                                                                                                                                                                                                                                                                                                                                                                                                          |                  |                                                   |                    |  |                             |                    |               |         |                                |       |         |         |                                  |                  |           |                   |        |         |                                    |                  |           |                          |         |        |                                  |                  |           |                   |        |        |                                  |                  |           |                     |                                                                                                                      |  |  |  |  |

|                                                                                                |                                                                                                                                                                                                                                                                                                                                                                                                                                |                                                                                                                                                                                                                                                                                                                                                                     |                                                                          |                                                                       |                                                                                                                                                                                                                                                                                                                         |                                                                                                                                                                                                                                                                                                                            |
|------------------------------------------------------------------------------------------------|--------------------------------------------------------------------------------------------------------------------------------------------------------------------------------------------------------------------------------------------------------------------------------------------------------------------------------------------------------------------------------------------------------------------------------|---------------------------------------------------------------------------------------------------------------------------------------------------------------------------------------------------------------------------------------------------------------------------------------------------------------------------------------------------------------------|--------------------------------------------------------------------------|-----------------------------------------------------------------------|-------------------------------------------------------------------------------------------------------------------------------------------------------------------------------------------------------------------------------------------------------------------------------------------------------------------------|----------------------------------------------------------------------------------------------------------------------------------------------------------------------------------------------------------------------------------------------------------------------------------------------------------------------------|
| RESOURCES                                                                                      | Is the incremental cost (or resource use) small relative to the benefits?                                                                                                                                                                                                                                                                                                                                                      | <input type="checkbox"/> Cost is very small relative to the benefits<br><input checked="" type="checkbox"/> Cost is small relative to the benefits<br><input type="checkbox"/> Cost is borderline relative to the benefits<br><input type="checkbox"/> Cost is high relative to the benefits<br><input type="checkbox"/> Cost is very high relative to the benefits |                                                                          | Agree    Somewhat agree    Uncertain    Somewhat disagree    Disagree | Costs are low <input type="checkbox"/> <input checked="" type="checkbox"/> <input type="checkbox"/> <input type="checkbox"/> <input type="checkbox"/><br>Benefits are important <input type="checkbox"/> <input checked="" type="checkbox"/> <input type="checkbox"/> <input type="checkbox"/> <input type="checkbox"/> | <ul style="list-style-type: none"> <li>Resources required seem to worth the net benefit.</li> <li>Both drugs are of low cost. Treatment with warfarin costs USD 5 more per patient per month<sup>ζ</sup>.</li> <li>Treatment with warfarin needs tight monitoring controls, increasing the burden of treatment.</li> </ul> |
|                                                                                                |                                                                                                                                                                                                                                                                                                                                                                                                                                |                                                                                                                                                                                                                                                                                                                                                                     |                                                                          |                                                                       |                                                                                                                                                                                                                                                                                                                         |                                                                                                                                                                                                                                                                                                                            |
| Balance of consequences                                                                        | Undesirable consequences clearly outweigh desirable consequences                                                                                                                                                                                                                                                                                                                                                               | Undesirable consequences probably outweigh desirable consequences                                                                                                                                                                                                                                                                                                   | The balance between desirable and undesirable consequences is uncertain* | There is a balance between desirable and undesirable consequences*    | Desirable consequences probably outweigh undesirable consequences                                                                                                                                                                                                                                                       | Desirable consequences clearly outweigh undesirable consequences                                                                                                                                                                                                                                                           |
|                                                                                                | <input type="checkbox"/>                                                                                                                                                                                                                                                                                                                                                                                                       | <input type="checkbox"/>                                                                                                                                                                                                                                                                                                                                            | <input type="checkbox"/>                                                 | <input type="checkbox"/>                                              | <input checked="" type="checkbox"/>                                                                                                                                                                                                                                                                                     | <input type="checkbox"/>                                                                                                                                                                                                                                                                                                   |
| Recommendation                                                                                 | We recommend against the option                                                                                                                                                                                                                                                                                                                                                                                                | We suggest not using the option                                                                                                                                                                                                                                                                                                                                     | We suggest using the option                                              |                                                                       | We recommend the option                                                                                                                                                                                                                                                                                                 |                                                                                                                                                                                                                                                                                                                            |
|                                                                                                | <input type="checkbox"/>                                                                                                                                                                                                                                                                                                                                                                                                       | <input type="checkbox"/>                                                                                                                                                                                                                                                                                                                                            | <input checked="" type="checkbox"/>                                      |                                                                       | <input type="checkbox"/>                                                                                                                                                                                                                                                                                                |                                                                                                                                                                                                                                                                                                                            |
| In patients at intermediate risk of stroke (CHADS2=1) we suggest using warfarin (over aspirin) |                                                                                                                                                                                                                                                                                                                                                                                                                                |                                                                                                                                                                                                                                                                                                                                                                     |                                                                          |                                                                       |                                                                                                                                                                                                                                                                                                                         |                                                                                                                                                                                                                                                                                                                            |
| Recommendation rationale                                                                       | The majority of patients place a higher value on avoiding a stroke than experiencing a bleeding and the inconvenience associated with warfarin. Given the absolute stroke reduction in stroke we suggest the use of warfarin (over aspirin) as most patients if informed would choose this treatment. However, this absolute stroke reduction is considered small for some patients, and many would not choose this treatment. |                                                                                                                                                                                                                                                                                                                                                                     |                                                                          |                                                                       |                                                                                                                                                                                                                                                                                                                         |                                                                                                                                                                                                                                                                                                                            |

\* In this situation no recommendation could be reasonable

ζ Hypothetical information
