# Supplementary material for: Developing and evaluating communication strategies to support informed decisions and practice based on evidence (DECIDE): protocol and preliminary results
Source: Implement Sci. 2013 Jan 9;8:6. doi: 10.1186/1748-5908-8-6 (PMC3553065; doi:10.1186/1748-5908-8-6)
Supplement: Additional file 2 — Example framework from WP2. [file 1748-5908-8-6-S2.pdf]

| Question                                                                                                                                                                                                                                                                                                                                                                                                                                                                                                                                                                                                                                                                                                                                                                                                                                                                                                                                                                                                                                                                                                                                                                                                                                                                                                                                                                                                                                                                                                                                                                                                                                                                                                                                                                                                                                                                                                                                                                                                                                                                                                                                                                                                                                                                                                                                                                                                                                                                                                                                                                                                                                                   |
|------------------------------------------------------------------------------------------------------------------------------------------------------------------------------------------------------------------------------------------------------------------------------------------------------------------------------------------------------------------------------------------------------------------------------------------------------------------------------------------------------------------------------------------------------------------------------------------------------------------------------------------------------------------------------------------------------------------------------------------------------------------------------------------------------------------------------------------------------------------------------------------------------------------------------------------------------------------------------------------------------------------------------------------------------------------------------------------------------------------------------------------------------------------------------------------------------------------------------------------------------------------------------------------------------------------------------------------------------------------------------------------------------------------------------------------------------------------------------------------------------------------------------------------------------------------------------------------------------------------------------------------------------------------------------------------------------------------------------------------------------------------------------------------------------------------------------------------------------------------------------------------------------------------------------------------------------------------------------------------------------------------------------------------------------------------------------------------------------------------------------------------------------------------------------------------------------------------------------------------------------------------------------------------------------------------------------------------------------------------------------------------------------------------------------------------------------------------------------------------------------------------------------------------------------------------------------------------------------------------------------------------------------------|
| Should Palivizumab be covered for immunoprophylaxis of respiratory syncytial virus (RSV) bronchiolitis in high-risk infants and young children?                                                                                                                                                                                                                                                                                                                                                                                                                                                                                                                                                                                                                                                                                                                                                                                                                                                                                                                                                                                                                                                                                                                                                                                                                                                                                                                                                                                                                                                                                                                                                                                                                                                                                                                                                                                                                                                                                                                                                                                                                                                                                                                                                                                                                                                                                                                                                                                                                                                                                                            |
| Background Information                                                                                                                                                                                                                                                                                                                                                                                                                                                                                                                                                                                                                                                                                                                                                                                                                                                                                                                                                                                                                                                                                                                                                                                                                                                                                                                                                                                                                                                                                                                                                                                                                                                                                                                                                                                                                                                                                                                                                                                                                                                                                                                                                                                                                                                                                                                                                                                                                                                                                                                                                                                                                                     |
| <p>RSV causes outbreaks of respiratory tract infection in temperate areas, especially in the winter months. It can affect people of any age and is usually a mild, self-limiting illness. It is most serious in infants and young children, in whom it is the single most important cause of lower respiratory tract infection (LRTI). RSV infection can present with a wide range of severity from mild respiratory symptoms, to rhinitis and otitis media, through to bronchiolitis, trachea-bronchiolitis and pneumonia. The diagnosis of bronchiolitis is based only on clinical signs and symptoms.</p> <p>The virus is spread by contaminated nasal secretions via respiratory droplets, so close contact with an infected individual or contaminated surface is required for transmission. RSV can persist for several hours on toys or other objects. Risk factors for RSV infection include crowding, low socioeconomic status, exposure to tobacco smoke and admission to hospital during the RSV season (late autumn to early spring). The children most at risk from severe disease if infected with RSV are infants under 6 weeks old or who have chronic lung disease (CLD), congenital heart disease (CHD) or immunodeficiency, and those born prematurely (at 35 weeks gestational age or before).</p> <p>Approximately 4%-11% of infants and young children develop bronchiolitis during the first three years of life. Among those approximately 50% are infected by RSV (data from Italy).</p> <p>The therapy for bronchiolitis due to RSV infection, both of moderate and severe degree, is based on ventilatory support and adequate hydration. The efficacy of ribavirin is uncertain. The prognosis is almost favorable.</p> <p>Passive Prophylaxis with high-titrated human polyclonal RSV IVIg does not significantly reduce the incidence of RSV infections. However, monthly prophylaxis significantly reduced the severity of RSV infections in very young high-risk patients, reduce the hospitalization rates and significantly shorter hospital stays compared to well-matched control patients.</p> <p>No vaccine are available.</p> <p>Palivizumab is the only licensed product available for prevention of RSV lower respiratory tract disease in infants and children with CLD, with a history of preterm birth (&lt;35 weeks' gestation), or with haemo-dynamically significant CHD. Palivizumab is a humanized murine monoclonal anti-F glycoprotein immunoglobulin with neutralizing and fusion inhibitory activity against RSV and it is administered intramuscularly at a dose of 15 mg/kg once every 30 days.</p> |

| Criteria                                                                            | Evidence                                                                                                                                                                                                                                                                                                                                                                                                                                                                                                                                                                                                                                                                                                                                                                                                                                                                                                                                                                                                                                                                                                                                                                                                                                                                                                                                                                                                                                                                                 | Judgement                                                                                                                                                                                                |     |           |    |                          |                                     |                                     |
|-------------------------------------------------------------------------------------|------------------------------------------------------------------------------------------------------------------------------------------------------------------------------------------------------------------------------------------------------------------------------------------------------------------------------------------------------------------------------------------------------------------------------------------------------------------------------------------------------------------------------------------------------------------------------------------------------------------------------------------------------------------------------------------------------------------------------------------------------------------------------------------------------------------------------------------------------------------------------------------------------------------------------------------------------------------------------------------------------------------------------------------------------------------------------------------------------------------------------------------------------------------------------------------------------------------------------------------------------------------------------------------------------------------------------------------------------------------------------------------------------------------------------------------------------------------------------------------|----------------------------------------------------------------------------------------------------------------------------------------------------------------------------------------------------------|-----|-----------|----|--------------------------|-------------------------------------|-------------------------------------|
| <b>Seriousness</b><br>Is the condition severe (e.g. life threatening or disabling)? | Most of the infected children develop respiratory distress of low or moderate degree.<br>IN Italy the hospitalization for bronchiolitis ranges from 0,6% to 5%. Among those children about 30%-50% are infected with RSV ( children both from high and low risk )<br>This variability is attributable to the different criteria for hospitalization and different tests used to diagnose the RSV infection.<br>The duration of hospitalization ranges from 5 to 6 days in Italy.<br>Mortality due to bronchiolitis is less than 1% in children infected with RSV without underlying illness (USA).<br>Mortality due to LRTI in those infected with RSV with heart and lung disease who are hospitalised is estimated to be around 3–5%.5 (USA).<br>On those basis about 6 deaths due to RSV infection are expected in the cohort of Italian newborns per year.                                                                                                                                                                                                                                                                                                                                                                                                                                                                                                                                                                                                                           | <table border="1"> <tr> <td>Yes</td><td>Uncertain</td><td>No</td></tr> <tr> <td><input type="checkbox"/></td><td><input type="checkbox"/></td><td><input checked="" type="checkbox"/></td></tr> </table> | Yes | Uncertain | No | <input type="checkbox"/> | <input type="checkbox"/>            | <input checked="" type="checkbox"/> |
| Yes                                                                                 | Uncertain                                                                                                                                                                                                                                                                                                                                                                                                                                                                                                                                                                                                                                                                                                                                                                                                                                                                                                                                                                                                                                                                                                                                                                                                                                                                                                                                                                                                                                                                                | No                                                                                                                                                                                                       |     |           |    |                          |                                     |                                     |
| <input type="checkbox"/>                                                            | <input type="checkbox"/>                                                                                                                                                                                                                                                                                                                                                                                                                                                                                                                                                                                                                                                                                                                                                                                                                                                                                                                                                                                                                                                                                                                                                                                                                                                                                                                                                                                                                                                                 | <input checked="" type="checkbox"/>                                                                                                                                                                      |     |           |    |                          |                                     |                                     |
| <b>Quality of evidence</b><br>Can we be confident in the estimates of effect?       | The efficacy of palivizumab has been evaluated in two different population (CHD and CLD) in two multicenter, placebo controlled, randomized clinical trials and the global quality of evidence is judge, following GRADE criteria, as LOW. The two trials have adequate concealment of allocation, double blind assessment, loss to follow-up clearly reported and and use of intention to treat analysis. Both studies measured as primary outcome the reduction in hospitalization rate as proxy of illness severity. They both present some flaws in directness dimension for the critical outcomes measured: the use of placebo in the control group instead of the prophylaxis with high-titrated human polyclonal RSV IVIg ; the use of unspecified type of tests for the detection of RSV infection. Both studies were underpowered to detect a difference in mortality between palivizumab and placebo group. Both studies were sponsored by the palivizumab manufacturer. The IMPact trial was also underpowered to detect a difference between subgroups and there is no evidence of a true underlying difference in effect size and it don't report relevant data for cystic fibrosis or immune deficiency subgroups.<br><br>The efficacy of palivizumab in preventing RSV infection was also evaluated in children with cystic fibrosis through a SR including one RCT with very important limitations. The global quality of evidence in this case turn out to be VERY LOW. | <table border="1"> <tr> <td>Yes</td><td>Uncertain</td><td>No</td></tr> <tr> <td><input type="checkbox"/></td><td><input checked="" type="checkbox"/></td><td><input type="checkbox"/></td></tr> </table> | Yes | Uncertain | No | <input type="checkbox"/> | <input checked="" type="checkbox"/> | <input type="checkbox"/>            |
| Yes                                                                                 | Uncertain                                                                                                                                                                                                                                                                                                                                                                                                                                                                                                                                                                                                                                                                                                                                                                                                                                                                                                                                                                                                                                                                                                                                                                                                                                                                                                                                                                                                                                                                                | No                                                                                                                                                                                                       |     |           |    |                          |                                     |                                     |
| <input type="checkbox"/>                                                            | <input checked="" type="checkbox"/>                                                                                                                                                                                                                                                                                                                                                                                                                                                                                                                                                                                                                                                                                                                                                                                                                                                                                                                                                                                                                                                                                                                                                                                                                                                                                                                                                                                                                                                      | <input type="checkbox"/>                                                                                                                                                                                 |     |           |    |                          |                                     |                                     |

| <p><b>Benefits</b><br/>Are the desirable effects large?</p>                                                                                                                                                                                                                                                                              | <p>It is uncertain whether palivizumab reduce incidence of RSV hospitalization, days hospitalized, need of oxygen therapy, ICU hospitalization rate, need in mechanical ventilation and mortality when measured in the population as whole both in premature children with or without CLD children, in children with CHD and in children with cystic fibrosis. It is also uncertain whether palivizumab reduce the incidence of the outcome above mentioned in subgroup of population analysed.</p> <p>A=overall population<br/>B=children of gestational age ≤ 24months old haemo-dynamically significant CHD and unoperated or partially corrected CHD<br/>C=children without CLD<br/>D=children with CLD<br/>E=children of gestational age 32-35 weeks<br/>F=children of gestational age &lt;32 weeks<br/>G=non-cyanotic children<br/>H=cyanotic children</p> <table border="1"> <thead> <tr> <th>Outcome</th><th>Results</th><th>GRADE</th></tr> </thead> <tbody> <tr> <td>Reduction in mortality</td><td>A, B: Inconclusive compared to placebo</td><td>⊕⊕⊕⊕<br/>VERY LOW</td></tr> <tr> <td>Reduction in incidence of bronchiolitis</td><td>A, B: Not measured</td><td>NOT EVALUABLE</td></tr> <tr> <td>Reduction in long term complications</td><td>A, B: Not measured</td><td>NOT EVALUABLE</td></tr> <tr> <td>Reduction in ICU hospitalization rate</td><td>A, B: Inconclusive compared to placebo</td><td>⊕⊕⊕⊕<br/>MODERATE</td></tr> <tr> <td>Reduction in need of mechanical ventilation</td><td>A, B: Inconclusive compared to placebo</td><td>⊕⊕⊕⊕<br/>MODERATE</td></tr> <tr> <td>Reduction in days hospitalized for bronchiolitis</td><td>A: 42% reduction in risk compared with placebo ( the difference in duration of hospitalization &lt;1 day)<br/><br/>B: 56% reduction in risk compared with placebo ( the difference in duration of hospitalization &lt;1 day)</td><td>⊕⊕⊕⊕<br/>MODERATE</td></tr> <tr> <td>Reduction in incidence of RSV hospitalization</td><td>A: 55% reduction in risk compared with placebo<br/><br/>B: 45% reduction in risk compared with placebo<br/><br/>C: 78% reduction in risk compared with placebo<br/><br/>D: 39% reduction in risk compared with placebo<br/><br/>E: 80% reduction in risk compared with placebo<br/><br/>F: 47% reduction in risk compared with placebo<br/><br/>G: 58% reduction in risk compared with placebo<br/><br/>H: Inconclusive compared with placebo</td><td>⊕⊕⊕⊕<br/>LOW</td></tr> <tr> <td colspan="3">The data reported above come from an HTA published in 2011.This document include RCTs affected by several methodological flaws that led their quality of evidence to be judge, using GRADE criteria, ranging from MODERATE to VERY LOW for the outcomes considered. That's why it is uncertain if the estimates of the effect are large.</td></tr> <tr> <td>Reduction in mortality in children with cystic fibrosis</td><td>Inconclusive compared to placebo</td><td>⊕⊕⊕⊕<br/>VERY LOW</td></tr> <tr> <td>Reduction in incidence of bronchiolitis in children with cystic fibrosis</td><td>Not measured</td><td>NOT EVALUABLE</td></tr> <tr> <td>Reduction in long term complications in children with cystic fibrosis</td><td>Not measured</td><td>NOT EVALUABLE</td></tr> <tr> <td>Reduction in</td><td>Inconclusive compared to placebo</td><td>⊕⊕⊕⊕<br/>VERY LOW</td></tr> </tbody> </table> | Outcome                  | Results | GRADE | Reduction in mortality | A, B: Inconclusive compared to placebo | ⊕⊕⊕⊕<br>VERY LOW | Reduction in incidence of bronchiolitis | A, B: Not measured | NOT EVALUABLE | Reduction in long term complications | A, B: Not measured | NOT EVALUABLE | Reduction in ICU hospitalization rate | A, B: Inconclusive compared to placebo | ⊕⊕⊕⊕<br>MODERATE | Reduction in need of mechanical ventilation | A, B: Inconclusive compared to placebo | ⊕⊕⊕⊕<br>MODERATE | Reduction in days hospitalized for bronchiolitis | A: 42% reduction in risk compared with placebo ( the difference in duration of hospitalization <1 day)<br><br>B: 56% reduction in risk compared with placebo ( the difference in duration of hospitalization <1 day) | ⊕⊕⊕⊕<br>MODERATE | Reduction in incidence of RSV hospitalization | A: 55% reduction in risk compared with placebo<br><br>B: 45% reduction in risk compared with placebo<br><br>C: 78% reduction in risk compared with placebo<br><br>D: 39% reduction in risk compared with placebo<br><br>E: 80% reduction in risk compared with placebo<br><br>F: 47% reduction in risk compared with placebo<br><br>G: 58% reduction in risk compared with placebo<br><br>H: Inconclusive compared with placebo | ⊕⊕⊕⊕<br>LOW | The data reported above come from an HTA published in 2011.This document include RCTs affected by several methodological flaws that led their quality of evidence to be judge, using GRADE criteria, ranging from MODERATE to VERY LOW for the outcomes considered. That's why it is uncertain if the estimates of the effect are large. |  |  | Reduction in mortality in children with cystic fibrosis | Inconclusive compared to placebo | ⊕⊕⊕⊕<br>VERY LOW | Reduction in incidence of bronchiolitis in children with cystic fibrosis | Not measured | NOT EVALUABLE | Reduction in long term complications in children with cystic fibrosis | Not measured | NOT EVALUABLE | Reduction in | Inconclusive compared to placebo | ⊕⊕⊕⊕<br>VERY LOW | <table border="1"> <tr> <td>Yes</td><td>Uncertain</td><td>No</td></tr> <tr> <td><input type="checkbox"/></td><td><input checked="" type="checkbox"/></td><td><input type="checkbox"/></td></tr> </table> | Yes | Uncertain | No | <input type="checkbox"/> | <input checked="" type="checkbox"/> | <input type="checkbox"/> |
|------------------------------------------------------------------------------------------------------------------------------------------------------------------------------------------------------------------------------------------------------------------------------------------------------------------------------------------|----------------------------------------------------------------------------------------------------------------------------------------------------------------------------------------------------------------------------------------------------------------------------------------------------------------------------------------------------------------------------------------------------------------------------------------------------------------------------------------------------------------------------------------------------------------------------------------------------------------------------------------------------------------------------------------------------------------------------------------------------------------------------------------------------------------------------------------------------------------------------------------------------------------------------------------------------------------------------------------------------------------------------------------------------------------------------------------------------------------------------------------------------------------------------------------------------------------------------------------------------------------------------------------------------------------------------------------------------------------------------------------------------------------------------------------------------------------------------------------------------------------------------------------------------------------------------------------------------------------------------------------------------------------------------------------------------------------------------------------------------------------------------------------------------------------------------------------------------------------------------------------------------------------------------------------------------------------------------------------------------------------------------------------------------------------------------------------------------------------------------------------------------------------------------------------------------------------------------------------------------------------------------------------------------------------------------------------------------------------------------------------------------------------------------------------------------------------------------------------------------------------------------------------------------------------------------------------------------------------------------------------------------------------------------------------------------------------------------------------------------------------------------------------------------------------------------------------------------------------------------------------------------------------------------------------------------------------------------------------------------------------------------------------------------------------------------------------------------------------------------------------------------------------------------------------------------------------------------------------------------------------------------------------------------------------------------------------------------------------------------------------------|--------------------------|---------|-------|------------------------|----------------------------------------|------------------|-----------------------------------------|--------------------|---------------|--------------------------------------|--------------------|---------------|---------------------------------------|----------------------------------------|------------------|---------------------------------------------|----------------------------------------|------------------|--------------------------------------------------|----------------------------------------------------------------------------------------------------------------------------------------------------------------------------------------------------------------------|------------------|-----------------------------------------------|---------------------------------------------------------------------------------------------------------------------------------------------------------------------------------------------------------------------------------------------------------------------------------------------------------------------------------------------------------------------------------------------------------------------------------|-------------|------------------------------------------------------------------------------------------------------------------------------------------------------------------------------------------------------------------------------------------------------------------------------------------------------------------------------------------|--|--|---------------------------------------------------------|----------------------------------|------------------|--------------------------------------------------------------------------|--------------|---------------|-----------------------------------------------------------------------|--------------|---------------|--------------|----------------------------------|------------------|----------------------------------------------------------------------------------------------------------------------------------------------------------------------------------------------------------|-----|-----------|----|--------------------------|-------------------------------------|--------------------------|
| Outcome                                                                                                                                                                                                                                                                                                                                  | Results                                                                                                                                                                                                                                                                                                                                                                                                                                                                                                                                                                                                                                                                                                                                                                                                                                                                                                                                                                                                                                                                                                                                                                                                                                                                                                                                                                                                                                                                                                                                                                                                                                                                                                                                                                                                                                                                                                                                                                                                                                                                                                                                                                                                                                                                                                                                                                                                                                                                                                                                                                                                                                                                                                                                                                                                                                                                                                                                                                                                                                                                                                                                                                                                                                                                                                                                                                                      | GRADE                    |         |       |                        |                                        |                  |                                         |                    |               |                                      |                    |               |                                       |                                        |                  |                                             |                                        |                  |                                                  |                                                                                                                                                                                                                      |                  |                                               |                                                                                                                                                                                                                                                                                                                                                                                                                                 |             |                                                                                                                                                                                                                                                                                                                                          |  |  |                                                         |                                  |                  |                                                                          |              |               |                                                                       |              |               |              |                                  |                  |                                                                                                                                                                                                          |     |           |    |                          |                                     |                          |
| Reduction in mortality                                                                                                                                                                                                                                                                                                                   | A, B: Inconclusive compared to placebo                                                                                                                                                                                                                                                                                                                                                                                                                                                                                                                                                                                                                                                                                                                                                                                                                                                                                                                                                                                                                                                                                                                                                                                                                                                                                                                                                                                                                                                                                                                                                                                                                                                                                                                                                                                                                                                                                                                                                                                                                                                                                                                                                                                                                                                                                                                                                                                                                                                                                                                                                                                                                                                                                                                                                                                                                                                                                                                                                                                                                                                                                                                                                                                                                                                                                                                                                       | ⊕⊕⊕⊕<br>VERY LOW         |         |       |                        |                                        |                  |                                         |                    |               |                                      |                    |               |                                       |                                        |                  |                                             |                                        |                  |                                                  |                                                                                                                                                                                                                      |                  |                                               |                                                                                                                                                                                                                                                                                                                                                                                                                                 |             |                                                                                                                                                                                                                                                                                                                                          |  |  |                                                         |                                  |                  |                                                                          |              |               |                                                                       |              |               |              |                                  |                  |                                                                                                                                                                                                          |     |           |    |                          |                                     |                          |
| Reduction in incidence of bronchiolitis                                                                                                                                                                                                                                                                                                  | A, B: Not measured                                                                                                                                                                                                                                                                                                                                                                                                                                                                                                                                                                                                                                                                                                                                                                                                                                                                                                                                                                                                                                                                                                                                                                                                                                                                                                                                                                                                                                                                                                                                                                                                                                                                                                                                                                                                                                                                                                                                                                                                                                                                                                                                                                                                                                                                                                                                                                                                                                                                                                                                                                                                                                                                                                                                                                                                                                                                                                                                                                                                                                                                                                                                                                                                                                                                                                                                                                           | NOT EVALUABLE            |         |       |                        |                                        |                  |                                         |                    |               |                                      |                    |               |                                       |                                        |                  |                                             |                                        |                  |                                                  |                                                                                                                                                                                                                      |                  |                                               |                                                                                                                                                                                                                                                                                                                                                                                                                                 |             |                                                                                                                                                                                                                                                                                                                                          |  |  |                                                         |                                  |                  |                                                                          |              |               |                                                                       |              |               |              |                                  |                  |                                                                                                                                                                                                          |     |           |    |                          |                                     |                          |
| Reduction in long term complications                                                                                                                                                                                                                                                                                                     | A, B: Not measured                                                                                                                                                                                                                                                                                                                                                                                                                                                                                                                                                                                                                                                                                                                                                                                                                                                                                                                                                                                                                                                                                                                                                                                                                                                                                                                                                                                                                                                                                                                                                                                                                                                                                                                                                                                                                                                                                                                                                                                                                                                                                                                                                                                                                                                                                                                                                                                                                                                                                                                                                                                                                                                                                                                                                                                                                                                                                                                                                                                                                                                                                                                                                                                                                                                                                                                                                                           | NOT EVALUABLE            |         |       |                        |                                        |                  |                                         |                    |               |                                      |                    |               |                                       |                                        |                  |                                             |                                        |                  |                                                  |                                                                                                                                                                                                                      |                  |                                               |                                                                                                                                                                                                                                                                                                                                                                                                                                 |             |                                                                                                                                                                                                                                                                                                                                          |  |  |                                                         |                                  |                  |                                                                          |              |               |                                                                       |              |               |              |                                  |                  |                                                                                                                                                                                                          |     |           |    |                          |                                     |                          |
| Reduction in ICU hospitalization rate                                                                                                                                                                                                                                                                                                    | A, B: Inconclusive compared to placebo                                                                                                                                                                                                                                                                                                                                                                                                                                                                                                                                                                                                                                                                                                                                                                                                                                                                                                                                                                                                                                                                                                                                                                                                                                                                                                                                                                                                                                                                                                                                                                                                                                                                                                                                                                                                                                                                                                                                                                                                                                                                                                                                                                                                                                                                                                                                                                                                                                                                                                                                                                                                                                                                                                                                                                                                                                                                                                                                                                                                                                                                                                                                                                                                                                                                                                                                                       | ⊕⊕⊕⊕<br>MODERATE         |         |       |                        |                                        |                  |                                         |                    |               |                                      |                    |               |                                       |                                        |                  |                                             |                                        |                  |                                                  |                                                                                                                                                                                                                      |                  |                                               |                                                                                                                                                                                                                                                                                                                                                                                                                                 |             |                                                                                                                                                                                                                                                                                                                                          |  |  |                                                         |                                  |                  |                                                                          |              |               |                                                                       |              |               |              |                                  |                  |                                                                                                                                                                                                          |     |           |    |                          |                                     |                          |
| Reduction in need of mechanical ventilation                                                                                                                                                                                                                                                                                              | A, B: Inconclusive compared to placebo                                                                                                                                                                                                                                                                                                                                                                                                                                                                                                                                                                                                                                                                                                                                                                                                                                                                                                                                                                                                                                                                                                                                                                                                                                                                                                                                                                                                                                                                                                                                                                                                                                                                                                                                                                                                                                                                                                                                                                                                                                                                                                                                                                                                                                                                                                                                                                                                                                                                                                                                                                                                                                                                                                                                                                                                                                                                                                                                                                                                                                                                                                                                                                                                                                                                                                                                                       | ⊕⊕⊕⊕<br>MODERATE         |         |       |                        |                                        |                  |                                         |                    |               |                                      |                    |               |                                       |                                        |                  |                                             |                                        |                  |                                                  |                                                                                                                                                                                                                      |                  |                                               |                                                                                                                                                                                                                                                                                                                                                                                                                                 |             |                                                                                                                                                                                                                                                                                                                                          |  |  |                                                         |                                  |                  |                                                                          |              |               |                                                                       |              |               |              |                                  |                  |                                                                                                                                                                                                          |     |           |    |                          |                                     |                          |
| Reduction in days hospitalized for bronchiolitis                                                                                                                                                                                                                                                                                         | A: 42% reduction in risk compared with placebo ( the difference in duration of hospitalization <1 day)<br><br>B: 56% reduction in risk compared with placebo ( the difference in duration of hospitalization <1 day)                                                                                                                                                                                                                                                                                                                                                                                                                                                                                                                                                                                                                                                                                                                                                                                                                                                                                                                                                                                                                                                                                                                                                                                                                                                                                                                                                                                                                                                                                                                                                                                                                                                                                                                                                                                                                                                                                                                                                                                                                                                                                                                                                                                                                                                                                                                                                                                                                                                                                                                                                                                                                                                                                                                                                                                                                                                                                                                                                                                                                                                                                                                                                                         | ⊕⊕⊕⊕<br>MODERATE         |         |       |                        |                                        |                  |                                         |                    |               |                                      |                    |               |                                       |                                        |                  |                                             |                                        |                  |                                                  |                                                                                                                                                                                                                      |                  |                                               |                                                                                                                                                                                                                                                                                                                                                                                                                                 |             |                                                                                                                                                                                                                                                                                                                                          |  |  |                                                         |                                  |                  |                                                                          |              |               |                                                                       |              |               |              |                                  |                  |                                                                                                                                                                                                          |     |           |    |                          |                                     |                          |
| Reduction in incidence of RSV hospitalization                                                                                                                                                                                                                                                                                            | A: 55% reduction in risk compared with placebo<br><br>B: 45% reduction in risk compared with placebo<br><br>C: 78% reduction in risk compared with placebo<br><br>D: 39% reduction in risk compared with placebo<br><br>E: 80% reduction in risk compared with placebo<br><br>F: 47% reduction in risk compared with placebo<br><br>G: 58% reduction in risk compared with placebo<br><br>H: Inconclusive compared with placebo                                                                                                                                                                                                                                                                                                                                                                                                                                                                                                                                                                                                                                                                                                                                                                                                                                                                                                                                                                                                                                                                                                                                                                                                                                                                                                                                                                                                                                                                                                                                                                                                                                                                                                                                                                                                                                                                                                                                                                                                                                                                                                                                                                                                                                                                                                                                                                                                                                                                                                                                                                                                                                                                                                                                                                                                                                                                                                                                                              | ⊕⊕⊕⊕<br>LOW              |         |       |                        |                                        |                  |                                         |                    |               |                                      |                    |               |                                       |                                        |                  |                                             |                                        |                  |                                                  |                                                                                                                                                                                                                      |                  |                                               |                                                                                                                                                                                                                                                                                                                                                                                                                                 |             |                                                                                                                                                                                                                                                                                                                                          |  |  |                                                         |                                  |                  |                                                                          |              |               |                                                                       |              |               |              |                                  |                  |                                                                                                                                                                                                          |     |           |    |                          |                                     |                          |
| The data reported above come from an HTA published in 2011.This document include RCTs affected by several methodological flaws that led their quality of evidence to be judge, using GRADE criteria, ranging from MODERATE to VERY LOW for the outcomes considered. That's why it is uncertain if the estimates of the effect are large. |                                                                                                                                                                                                                                                                                                                                                                                                                                                                                                                                                                                                                                                                                                                                                                                                                                                                                                                                                                                                                                                                                                                                                                                                                                                                                                                                                                                                                                                                                                                                                                                                                                                                                                                                                                                                                                                                                                                                                                                                                                                                                                                                                                                                                                                                                                                                                                                                                                                                                                                                                                                                                                                                                                                                                                                                                                                                                                                                                                                                                                                                                                                                                                                                                                                                                                                                                                                              |                          |         |       |                        |                                        |                  |                                         |                    |               |                                      |                    |               |                                       |                                        |                  |                                             |                                        |                  |                                                  |                                                                                                                                                                                                                      |                  |                                               |                                                                                                                                                                                                                                                                                                                                                                                                                                 |             |                                                                                                                                                                                                                                                                                                                                          |  |  |                                                         |                                  |                  |                                                                          |              |               |                                                                       |              |               |              |                                  |                  |                                                                                                                                                                                                          |     |           |    |                          |                                     |                          |
| Reduction in mortality in children with cystic fibrosis                                                                                                                                                                                                                                                                                  | Inconclusive compared to placebo                                                                                                                                                                                                                                                                                                                                                                                                                                                                                                                                                                                                                                                                                                                                                                                                                                                                                                                                                                                                                                                                                                                                                                                                                                                                                                                                                                                                                                                                                                                                                                                                                                                                                                                                                                                                                                                                                                                                                                                                                                                                                                                                                                                                                                                                                                                                                                                                                                                                                                                                                                                                                                                                                                                                                                                                                                                                                                                                                                                                                                                                                                                                                                                                                                                                                                                                                             | ⊕⊕⊕⊕<br>VERY LOW         |         |       |                        |                                        |                  |                                         |                    |               |                                      |                    |               |                                       |                                        |                  |                                             |                                        |                  |                                                  |                                                                                                                                                                                                                      |                  |                                               |                                                                                                                                                                                                                                                                                                                                                                                                                                 |             |                                                                                                                                                                                                                                                                                                                                          |  |  |                                                         |                                  |                  |                                                                          |              |               |                                                                       |              |               |              |                                  |                  |                                                                                                                                                                                                          |     |           |    |                          |                                     |                          |
| Reduction in incidence of bronchiolitis in children with cystic fibrosis                                                                                                                                                                                                                                                                 | Not measured                                                                                                                                                                                                                                                                                                                                                                                                                                                                                                                                                                                                                                                                                                                                                                                                                                                                                                                                                                                                                                                                                                                                                                                                                                                                                                                                                                                                                                                                                                                                                                                                                                                                                                                                                                                                                                                                                                                                                                                                                                                                                                                                                                                                                                                                                                                                                                                                                                                                                                                                                                                                                                                                                                                                                                                                                                                                                                                                                                                                                                                                                                                                                                                                                                                                                                                                                                                 | NOT EVALUABLE            |         |       |                        |                                        |                  |                                         |                    |               |                                      |                    |               |                                       |                                        |                  |                                             |                                        |                  |                                                  |                                                                                                                                                                                                                      |                  |                                               |                                                                                                                                                                                                                                                                                                                                                                                                                                 |             |                                                                                                                                                                                                                                                                                                                                          |  |  |                                                         |                                  |                  |                                                                          |              |               |                                                                       |              |               |              |                                  |                  |                                                                                                                                                                                                          |     |           |    |                          |                                     |                          |
| Reduction in long term complications in children with cystic fibrosis                                                                                                                                                                                                                                                                    | Not measured                                                                                                                                                                                                                                                                                                                                                                                                                                                                                                                                                                                                                                                                                                                                                                                                                                                                                                                                                                                                                                                                                                                                                                                                                                                                                                                                                                                                                                                                                                                                                                                                                                                                                                                                                                                                                                                                                                                                                                                                                                                                                                                                                                                                                                                                                                                                                                                                                                                                                                                                                                                                                                                                                                                                                                                                                                                                                                                                                                                                                                                                                                                                                                                                                                                                                                                                                                                 | NOT EVALUABLE            |         |       |                        |                                        |                  |                                         |                    |               |                                      |                    |               |                                       |                                        |                  |                                             |                                        |                  |                                                  |                                                                                                                                                                                                                      |                  |                                               |                                                                                                                                                                                                                                                                                                                                                                                                                                 |             |                                                                                                                                                                                                                                                                                                                                          |  |  |                                                         |                                  |                  |                                                                          |              |               |                                                                       |              |               |              |                                  |                  |                                                                                                                                                                                                          |     |           |    |                          |                                     |                          |
| Reduction in                                                                                                                                                                                                                                                                                                                             | Inconclusive compared to placebo                                                                                                                                                                                                                                                                                                                                                                                                                                                                                                                                                                                                                                                                                                                                                                                                                                                                                                                                                                                                                                                                                                                                                                                                                                                                                                                                                                                                                                                                                                                                                                                                                                                                                                                                                                                                                                                                                                                                                                                                                                                                                                                                                                                                                                                                                                                                                                                                                                                                                                                                                                                                                                                                                                                                                                                                                                                                                                                                                                                                                                                                                                                                                                                                                                                                                                                                                             | ⊕⊕⊕⊕<br>VERY LOW         |         |       |                        |                                        |                  |                                         |                    |               |                                      |                    |               |                                       |                                        |                  |                                             |                                        |                  |                                                  |                                                                                                                                                                                                                      |                  |                                               |                                                                                                                                                                                                                                                                                                                                                                                                                                 |             |                                                                                                                                                                                                                                                                                                                                          |  |  |                                                         |                                  |                  |                                                                          |              |               |                                                                       |              |               |              |                                  |                  |                                                                                                                                                                                                          |     |           |    |                          |                                     |                          |
| Yes                                                                                                                                                                                                                                                                                                                                      | Uncertain                                                                                                                                                                                                                                                                                                                                                                                                                                                                                                                                                                                                                                                                                                                                                                                                                                                                                                                                                                                                                                                                                                                                                                                                                                                                                                                                                                                                                                                                                                                                                                                                                                                                                                                                                                                                                                                                                                                                                                                                                                                                                                                                                                                                                                                                                                                                                                                                                                                                                                                                                                                                                                                                                                                                                                                                                                                                                                                                                                                                                                                                                                                                                                                                                                                                                                                                                                                    | No                       |         |       |                        |                                        |                  |                                         |                    |               |                                      |                    |               |                                       |                                        |                  |                                             |                                        |                  |                                                  |                                                                                                                                                                                                                      |                  |                                               |                                                                                                                                                                                                                                                                                                                                                                                                                                 |             |                                                                                                                                                                                                                                                                                                                                          |  |  |                                                         |                                  |                  |                                                                          |              |               |                                                                       |              |               |              |                                  |                  |                                                                                                                                                                                                          |     |           |    |                          |                                     |                          |
| <input type="checkbox"/>                                                                                                                                                                                                                                                                                                                 | <input checked="" type="checkbox"/>                                                                                                                                                                                                                                                                                                                                                                                                                                                                                                                                                                                                                                                                                                                                                                                                                                                                                                                                                                                                                                                                                                                                                                                                                                                                                                                                                                                                                                                                                                                                                                                                                                                                                                                                                                                                                                                                                                                                                                                                                                                                                                                                                                                                                                                                                                                                                                                                                                                                                                                                                                                                                                                                                                                                                                                                                                                                                                                                                                                                                                                                                                                                                                                                                                                                                                                                                          | <input type="checkbox"/> |         |       |                        |                                        |                  |                                         |                    |               |                                      |                    |               |                                       |                                        |                  |                                             |                                        |                  |                                                  |                                                                                                                                                                                                                      |                  |                                               |                                                                                                                                                                                                                                                                                                                                                                                                                                 |             |                                                                                                                                                                                                                                                                                                                                          |  |  |                                                         |                                  |                  |                                                                          |              |               |                                                                       |              |               |              |                                  |                  |                                                                                                                                                                                                          |     |           |    |                          |                                     |                          |

|                                                                                                                         | <div>incidence of RSV hospitalization in children with cystic fibrosis</div> <div>These data come from a SR document published in 2010. This document include one RCT affected by several methodological flaws that leid his quality of evidence to be judge, using GRADE criteria, as VERY LOW for the outcomes considered. That' why it is uncertain if there is any benefit using palivizumab.</div>                                                                                                                                                                                                                                                                                                                                                                                                                                                                                                                                                                                                                                                                                                                                                                                                                                                                                                                                                                                                                                                                                                                                                                                                                                                                                                                                                                                                                                                                                                  |                                                                                                                                                                                            |            |       |                   |                                  |             |                                                                                                                                                                                            |            |             |      |  |  |                     |    |  |  |          |    |     |  |                  |      |     |      |                                        |  |  |  |  |             |                |            |             |      |  |  |                     |    |  |  |          |     |     |  |                  |      |     |      |                                                  |  |  |  |  |             |                |            |             |      |  |  |                     |    |  |  |          |     |     |  |                  |      |     |      |                                                 |  |  |  |  |             |                |            |             |      |  |  |                     |    |  |  |          |     |     |  |                  |      |     |      |                                                                                                                                                                                            |
|-------------------------------------------------------------------------------------------------------------------------|----------------------------------------------------------------------------------------------------------------------------------------------------------------------------------------------------------------------------------------------------------------------------------------------------------------------------------------------------------------------------------------------------------------------------------------------------------------------------------------------------------------------------------------------------------------------------------------------------------------------------------------------------------------------------------------------------------------------------------------------------------------------------------------------------------------------------------------------------------------------------------------------------------------------------------------------------------------------------------------------------------------------------------------------------------------------------------------------------------------------------------------------------------------------------------------------------------------------------------------------------------------------------------------------------------------------------------------------------------------------------------------------------------------------------------------------------------------------------------------------------------------------------------------------------------------------------------------------------------------------------------------------------------------------------------------------------------------------------------------------------------------------------------------------------------------------------------------------------------------------------------------------------------|--------------------------------------------------------------------------------------------------------------------------------------------------------------------------------------------|------------|-------|-------------------|----------------------------------|-------------|--------------------------------------------------------------------------------------------------------------------------------------------------------------------------------------------|------------|-------------|------|--|--|---------------------|----|--|--|----------|----|-----|--|------------------|------|-----|------|----------------------------------------|--|--|--|--|-------------|----------------|------------|-------------|------|--|--|---------------------|----|--|--|----------|-----|-----|--|------------------|------|-----|------|--------------------------------------------------|--|--|--|--|-------------|----------------|------------|-------------|------|--|--|---------------------|----|--|--|----------|-----|-----|--|------------------|------|-----|------|-------------------------------------------------|--|--|--|--|-------------|----------------|------------|-------------|------|--|--|---------------------|----|--|--|----------|-----|-----|--|------------------|------|-----|------|--------------------------------------------------------------------------------------------------------------------------------------------------------------------------------------------|
| <div>Adverse effects</div> <div>Are the undesirable effects of the option small?</div>                                  | <table><tr><th>Outcome</th><th>Results</th><th>GRADE</th></tr><tr><td>Any adverse event</td><td>Inconclusive compared to placebo</td><td>⊕⊕⊕⊕<br/>LOW</td></tr></table> <div>These data come from a HTA document published in 2011 and a SR published in 2010. The documents include RCTs affected by several methodological flaws that leid their quality of evidence to be judge, using GRADE criteria, as LOW. That's why it is uncertain if the undesirable effects are small. These data are related to all of the populations considered in evaluating the estimate of beneficial effects</div>                                                                                                                                                                                                                                                                                                                                                                                                                                                                                                                                                                                                                                                                                                                                                                                                                                                                                                                                                                                                                                                                                                                                                                                                                                                                                                    | Outcome                                                                                                                                                                                    | Results    | GRADE | Any adverse event | Inconclusive compared to placebo | ⊕⊕⊕⊕<br>LOW | <div><div>Yes</div><div>Uncertain</div><div>No</div></div> <div><div><input type="checkbox"/></div><div><input checked="" type="checkbox"/></div><div><input type="checkbox"/></div></div> |            |             |      |  |  |                     |    |  |  |          |    |     |  |                  |      |     |      |                                        |  |  |  |  |             |                |            |             |      |  |  |                     |    |  |  |          |     |     |  |                  |      |     |      |                                                  |  |  |  |  |             |                |            |             |      |  |  |                     |    |  |  |          |     |     |  |                  |      |     |      |                                                 |  |  |  |  |             |                |            |             |      |  |  |                     |    |  |  |          |     |     |  |                  |      |     |      |                                                                                                                                                                                            |
| Outcome                                                                                                                 | Results                                                                                                                                                                                                                                                                                                                                                                                                                                                                                                                                                                                                                                                                                                                                                                                                                                                                                                                                                                                                                                                                                                                                                                                                                                                                                                                                                                                                                                                                                                                                                                                                                                                                                                                                                                                                                                                                                                  | GRADE                                                                                                                                                                                      |            |       |                   |                                  |             |                                                                                                                                                                                            |            |             |      |  |  |                     |    |  |  |          |    |     |  |                  |      |     |      |                                        |  |  |  |  |             |                |            |             |      |  |  |                     |    |  |  |          |     |     |  |                  |      |     |      |                                                  |  |  |  |  |             |                |            |             |      |  |  |                     |    |  |  |          |     |     |  |                  |      |     |      |                                                 |  |  |  |  |             |                |            |             |      |  |  |                     |    |  |  |          |     |     |  |                  |      |     |      |                                                                                                                                                                                            |
| Any adverse event                                                                                                       | Inconclusive compared to placebo                                                                                                                                                                                                                                                                                                                                                                                                                                                                                                                                                                                                                                                                                                                                                                                                                                                                                                                                                                                                                                                                                                                                                                                                                                                                                                                                                                                                                                                                                                                                                                                                                                                                                                                                                                                                                                                                         | ⊕⊕⊕⊕<br>LOW                                                                                                                                                                                |            |       |                   |                                  |             |                                                                                                                                                                                            |            |             |      |  |  |                     |    |  |  |          |    |     |  |                  |      |     |      |                                        |  |  |  |  |             |                |            |             |      |  |  |                     |    |  |  |          |     |     |  |                  |      |     |      |                                                  |  |  |  |  |             |                |            |             |      |  |  |                     |    |  |  |          |     |     |  |                  |      |     |      |                                                 |  |  |  |  |             |                |            |             |      |  |  |                     |    |  |  |          |     |     |  |                  |      |     |      |                                                                                                                                                                                            |
| <div>Resource use (costs)</div> <div>Are the costs low/affordable?</div>                                                | <table><tr><th colspan="4">Average costs in children without CLD (£)</th></tr><tr><th></th><th>Palivizumab</th><th>No prophylaxis</th><th>Difference</th></tr><tr><td>Palivizumab</td><td>3437</td><td></td><td></td></tr><tr><td>Drug administration</td><td>60</td><td></td><td></td></tr><tr><td>Hospital</td><td>67</td><td>301</td><td></td></tr><tr><td>Total cost (NHS)</td><td>3564</td><td>301</td><td>3263</td></tr></table> <table><tr><th colspan="4">Average costs in children with CLD (£)</th></tr><tr><th></th><th>Palivizumab</th><th>No prophylaxis</th><th>Difference</th></tr><tr><td>Palivizumab</td><td>3437</td><td></td><td></td></tr><tr><td>Drug administration</td><td>60</td><td></td><td></td></tr><tr><td>Hospital</td><td>293</td><td>475</td><td></td></tr><tr><td>Total cost (NHS)</td><td>3790</td><td>475</td><td>3315</td></tr></table> <table><tr><th colspan="4">Average costs in children with acyanotic CHD (£)</th></tr><tr><th></th><th>Palivizumab</th><th>No prophylaxis</th><th>Difference</th></tr><tr><td>Palivizumab</td><td>3714</td><td></td><td></td></tr><tr><td>Drug administration</td><td>60</td><td></td><td></td></tr><tr><td>Hospital</td><td>359</td><td>647</td><td></td></tr><tr><td>Total cost (NHS)</td><td>4132</td><td>847</td><td>3285</td></tr></table> <table><tr><th colspan="4">Average costs in children with cyanotic CHD (£)</th></tr><tr><th></th><th>Palivizumab</th><th>No prophylaxis</th><th>Difference</th></tr><tr><td>Palivizumab</td><td>3714</td><td></td><td></td></tr><tr><td>Drug administration</td><td>60</td><td></td><td></td></tr><tr><td>Hospital</td><td>402</td><td>567</td><td></td></tr><tr><td>Total cost (NHS)</td><td>4176</td><td>567</td><td>3609</td></tr></table> <div>These data derive from a recent HTA (Wang 2011). Palivizumab was considered using a five doses scheme (see page 20).</div> | Average costs in children without CLD (£)                                                                                                                                                  |            |       |                   |                                  | Palivizumab | No prophylaxis                                                                                                                                                                             | Difference | Palivizumab | 3437 |  |  | Drug administration | 60 |  |  | Hospital | 67 | 301 |  | Total cost (NHS) | 3564 | 301 | 3263 | Average costs in children with CLD (£) |  |  |  |  | Palivizumab | No prophylaxis | Difference | Palivizumab | 3437 |  |  | Drug administration | 60 |  |  | Hospital | 293 | 475 |  | Total cost (NHS) | 3790 | 475 | 3315 | Average costs in children with acyanotic CHD (£) |  |  |  |  | Palivizumab | No prophylaxis | Difference | Palivizumab | 3714 |  |  | Drug administration | 60 |  |  | Hospital | 359 | 647 |  | Total cost (NHS) | 4132 | 847 | 3285 | Average costs in children with cyanotic CHD (£) |  |  |  |  | Palivizumab | No prophylaxis | Difference | Palivizumab | 3714 |  |  | Drug administration | 60 |  |  | Hospital | 402 | 567 |  | Total cost (NHS) | 4176 | 567 | 3609 | <div><div>Yes</div><div>Uncertain</div><div>No</div></div> <div><div><input type="checkbox"/></div><div><input type="checkbox"/></div><div><input checked="" type="checkbox"/></div></div> |
| Average costs in children without CLD (£)                                                                               |                                                                                                                                                                                                                                                                                                                                                                                                                                                                                                                                                                                                                                                                                                                                                                                                                                                                                                                                                                                                                                                                                                                                                                                                                                                                                                                                                                                                                                                                                                                                                                                                                                                                                                                                                                                                                                                                                                          |                                                                                                                                                                                            |            |       |                   |                                  |             |                                                                                                                                                                                            |            |             |      |  |  |                     |    |  |  |          |    |     |  |                  |      |     |      |                                        |  |  |  |  |             |                |            |             |      |  |  |                     |    |  |  |          |     |     |  |                  |      |     |      |                                                  |  |  |  |  |             |                |            |             |      |  |  |                     |    |  |  |          |     |     |  |                  |      |     |      |                                                 |  |  |  |  |             |                |            |             |      |  |  |                     |    |  |  |          |     |     |  |                  |      |     |      |                                                                                                                                                                                            |
|                                                                                                                         | Palivizumab                                                                                                                                                                                                                                                                                                                                                                                                                                                                                                                                                                                                                                                                                                                                                                                                                                                                                                                                                                                                                                                                                                                                                                                                                                                                                                                                                                                                                                                                                                                                                                                                                                                                                                                                                                                                                                                                                              | No prophylaxis                                                                                                                                                                             | Difference |       |                   |                                  |             |                                                                                                                                                                                            |            |             |      |  |  |                     |    |  |  |          |    |     |  |                  |      |     |      |                                        |  |  |  |  |             |                |            |             |      |  |  |                     |    |  |  |          |     |     |  |                  |      |     |      |                                                  |  |  |  |  |             |                |            |             |      |  |  |                     |    |  |  |          |     |     |  |                  |      |     |      |                                                 |  |  |  |  |             |                |            |             |      |  |  |                     |    |  |  |          |     |     |  |                  |      |     |      |                                                                                                                                                                                            |
| Palivizumab                                                                                                             | 3437                                                                                                                                                                                                                                                                                                                                                                                                                                                                                                                                                                                                                                                                                                                                                                                                                                                                                                                                                                                                                                                                                                                                                                                                                                                                                                                                                                                                                                                                                                                                                                                                                                                                                                                                                                                                                                                                                                     |                                                                                                                                                                                            |            |       |                   |                                  |             |                                                                                                                                                                                            |            |             |      |  |  |                     |    |  |  |          |    |     |  |                  |      |     |      |                                        |  |  |  |  |             |                |            |             |      |  |  |                     |    |  |  |          |     |     |  |                  |      |     |      |                                                  |  |  |  |  |             |                |            |             |      |  |  |                     |    |  |  |          |     |     |  |                  |      |     |      |                                                 |  |  |  |  |             |                |            |             |      |  |  |                     |    |  |  |          |     |     |  |                  |      |     |      |                                                                                                                                                                                            |
| Drug administration                                                                                                     | 60                                                                                                                                                                                                                                                                                                                                                                                                                                                                                                                                                                                                                                                                                                                                                                                                                                                                                                                                                                                                                                                                                                                                                                                                                                                                                                                                                                                                                                                                                                                                                                                                                                                                                                                                                                                                                                                                                                       |                                                                                                                                                                                            |            |       |                   |                                  |             |                                                                                                                                                                                            |            |             |      |  |  |                     |    |  |  |          |    |     |  |                  |      |     |      |                                        |  |  |  |  |             |                |            |             |      |  |  |                     |    |  |  |          |     |     |  |                  |      |     |      |                                                  |  |  |  |  |             |                |            |             |      |  |  |                     |    |  |  |          |     |     |  |                  |      |     |      |                                                 |  |  |  |  |             |                |            |             |      |  |  |                     |    |  |  |          |     |     |  |                  |      |     |      |                                                                                                                                                                                            |
| Hospital                                                                                                                | 67                                                                                                                                                                                                                                                                                                                                                                                                                                                                                                                                                                                                                                                                                                                                                                                                                                                                                                                                                                                                                                                                                                                                                                                                                                                                                                                                                                                                                                                                                                                                                                                                                                                                                                                                                                                                                                                                                                       | 301                                                                                                                                                                                        |            |       |                   |                                  |             |                                                                                                                                                                                            |            |             |      |  |  |                     |    |  |  |          |    |     |  |                  |      |     |      |                                        |  |  |  |  |             |                |            |             |      |  |  |                     |    |  |  |          |     |     |  |                  |      |     |      |                                                  |  |  |  |  |             |                |            |             |      |  |  |                     |    |  |  |          |     |     |  |                  |      |     |      |                                                 |  |  |  |  |             |                |            |             |      |  |  |                     |    |  |  |          |     |     |  |                  |      |     |      |                                                                                                                                                                                            |
| Total cost (NHS)                                                                                                        | 3564                                                                                                                                                                                                                                                                                                                                                                                                                                                                                                                                                                                                                                                                                                                                                                                                                                                                                                                                                                                                                                                                                                                                                                                                                                                                                                                                                                                                                                                                                                                                                                                                                                                                                                                                                                                                                                                                                                     | 301                                                                                                                                                                                        | 3263       |       |                   |                                  |             |                                                                                                                                                                                            |            |             |      |  |  |                     |    |  |  |          |    |     |  |                  |      |     |      |                                        |  |  |  |  |             |                |            |             |      |  |  |                     |    |  |  |          |     |     |  |                  |      |     |      |                                                  |  |  |  |  |             |                |            |             |      |  |  |                     |    |  |  |          |     |     |  |                  |      |     |      |                                                 |  |  |  |  |             |                |            |             |      |  |  |                     |    |  |  |          |     |     |  |                  |      |     |      |                                                                                                                                                                                            |
| Average costs in children with CLD (£)                                                                                  |                                                                                                                                                                                                                                                                                                                                                                                                                                                                                                                                                                                                                                                                                                                                                                                                                                                                                                                                                                                                                                                                                                                                                                                                                                                                                                                                                                                                                                                                                                                                                                                                                                                                                                                                                                                                                                                                                                          |                                                                                                                                                                                            |            |       |                   |                                  |             |                                                                                                                                                                                            |            |             |      |  |  |                     |    |  |  |          |    |     |  |                  |      |     |      |                                        |  |  |  |  |             |                |            |             |      |  |  |                     |    |  |  |          |     |     |  |                  |      |     |      |                                                  |  |  |  |  |             |                |            |             |      |  |  |                     |    |  |  |          |     |     |  |                  |      |     |      |                                                 |  |  |  |  |             |                |            |             |      |  |  |                     |    |  |  |          |     |     |  |                  |      |     |      |                                                                                                                                                                                            |
|                                                                                                                         | Palivizumab                                                                                                                                                                                                                                                                                                                                                                                                                                                                                                                                                                                                                                                                                                                                                                                                                                                                                                                                                                                                                                                                                                                                                                                                                                                                                                                                                                                                                                                                                                                                                                                                                                                                                                                                                                                                                                                                                              | No prophylaxis                                                                                                                                                                             | Difference |       |                   |                                  |             |                                                                                                                                                                                            |            |             |      |  |  |                     |    |  |  |          |    |     |  |                  |      |     |      |                                        |  |  |  |  |             |                |            |             |      |  |  |                     |    |  |  |          |     |     |  |                  |      |     |      |                                                  |  |  |  |  |             |                |            |             |      |  |  |                     |    |  |  |          |     |     |  |                  |      |     |      |                                                 |  |  |  |  |             |                |            |             |      |  |  |                     |    |  |  |          |     |     |  |                  |      |     |      |                                                                                                                                                                                            |
| Palivizumab                                                                                                             | 3437                                                                                                                                                                                                                                                                                                                                                                                                                                                                                                                                                                                                                                                                                                                                                                                                                                                                                                                                                                                                                                                                                                                                                                                                                                                                                                                                                                                                                                                                                                                                                                                                                                                                                                                                                                                                                                                                                                     |                                                                                                                                                                                            |            |       |                   |                                  |             |                                                                                                                                                                                            |            |             |      |  |  |                     |    |  |  |          |    |     |  |                  |      |     |      |                                        |  |  |  |  |             |                |            |             |      |  |  |                     |    |  |  |          |     |     |  |                  |      |     |      |                                                  |  |  |  |  |             |                |            |             |      |  |  |                     |    |  |  |          |     |     |  |                  |      |     |      |                                                 |  |  |  |  |             |                |            |             |      |  |  |                     |    |  |  |          |     |     |  |                  |      |     |      |                                                                                                                                                                                            |
| Drug administration                                                                                                     | 60                                                                                                                                                                                                                                                                                                                                                                                                                                                                                                                                                                                                                                                                                                                                                                                                                                                                                                                                                                                                                                                                                                                                                                                                                                                                                                                                                                                                                                                                                                                                                                                                                                                                                                                                                                                                                                                                                                       |                                                                                                                                                                                            |            |       |                   |                                  |             |                                                                                                                                                                                            |            |             |      |  |  |                     |    |  |  |          |    |     |  |                  |      |     |      |                                        |  |  |  |  |             |                |            |             |      |  |  |                     |    |  |  |          |     |     |  |                  |      |     |      |                                                  |  |  |  |  |             |                |            |             |      |  |  |                     |    |  |  |          |     |     |  |                  |      |     |      |                                                 |  |  |  |  |             |                |            |             |      |  |  |                     |    |  |  |          |     |     |  |                  |      |     |      |                                                                                                                                                                                            |
| Hospital                                                                                                                | 293                                                                                                                                                                                                                                                                                                                                                                                                                                                                                                                                                                                                                                                                                                                                                                                                                                                                                                                                                                                                                                                                                                                                                                                                                                                                                                                                                                                                                                                                                                                                                                                                                                                                                                                                                                                                                                                                                                      | 475                                                                                                                                                                                        |            |       |                   |                                  |             |                                                                                                                                                                                            |            |             |      |  |  |                     |    |  |  |          |    |     |  |                  |      |     |      |                                        |  |  |  |  |             |                |            |             |      |  |  |                     |    |  |  |          |     |     |  |                  |      |     |      |                                                  |  |  |  |  |             |                |            |             |      |  |  |                     |    |  |  |          |     |     |  |                  |      |     |      |                                                 |  |  |  |  |             |                |            |             |      |  |  |                     |    |  |  |          |     |     |  |                  |      |     |      |                                                                                                                                                                                            |
| Total cost (NHS)                                                                                                        | 3790                                                                                                                                                                                                                                                                                                                                                                                                                                                                                                                                                                                                                                                                                                                                                                                                                                                                                                                                                                                                                                                                                                                                                                                                                                                                                                                                                                                                                                                                                                                                                                                                                                                                                                                                                                                                                                                                                                     | 475                                                                                                                                                                                        | 3315       |       |                   |                                  |             |                                                                                                                                                                                            |            |             |      |  |  |                     |    |  |  |          |    |     |  |                  |      |     |      |                                        |  |  |  |  |             |                |            |             |      |  |  |                     |    |  |  |          |     |     |  |                  |      |     |      |                                                  |  |  |  |  |             |                |            |             |      |  |  |                     |    |  |  |          |     |     |  |                  |      |     |      |                                                 |  |  |  |  |             |                |            |             |      |  |  |                     |    |  |  |          |     |     |  |                  |      |     |      |                                                                                                                                                                                            |
| Average costs in children with acyanotic CHD (£)                                                                        |                                                                                                                                                                                                                                                                                                                                                                                                                                                                                                                                                                                                                                                                                                                                                                                                                                                                                                                                                                                                                                                                                                                                                                                                                                                                                                                                                                                                                                                                                                                                                                                                                                                                                                                                                                                                                                                                                                          |                                                                                                                                                                                            |            |       |                   |                                  |             |                                                                                                                                                                                            |            |             |      |  |  |                     |    |  |  |          |    |     |  |                  |      |     |      |                                        |  |  |  |  |             |                |            |             |      |  |  |                     |    |  |  |          |     |     |  |                  |      |     |      |                                                  |  |  |  |  |             |                |            |             |      |  |  |                     |    |  |  |          |     |     |  |                  |      |     |      |                                                 |  |  |  |  |             |                |            |             |      |  |  |                     |    |  |  |          |     |     |  |                  |      |     |      |                                                                                                                                                                                            |
|                                                                                                                         | Palivizumab                                                                                                                                                                                                                                                                                                                                                                                                                                                                                                                                                                                                                                                                                                                                                                                                                                                                                                                                                                                                                                                                                                                                                                                                                                                                                                                                                                                                                                                                                                                                                                                                                                                                                                                                                                                                                                                                                              | No prophylaxis                                                                                                                                                                             | Difference |       |                   |                                  |             |                                                                                                                                                                                            |            |             |      |  |  |                     |    |  |  |          |    |     |  |                  |      |     |      |                                        |  |  |  |  |             |                |            |             |      |  |  |                     |    |  |  |          |     |     |  |                  |      |     |      |                                                  |  |  |  |  |             |                |            |             |      |  |  |                     |    |  |  |          |     |     |  |                  |      |     |      |                                                 |  |  |  |  |             |                |            |             |      |  |  |                     |    |  |  |          |     |     |  |                  |      |     |      |                                                                                                                                                                                            |
| Palivizumab                                                                                                             | 3714                                                                                                                                                                                                                                                                                                                                                                                                                                                                                                                                                                                                                                                                                                                                                                                                                                                                                                                                                                                                                                                                                                                                                                                                                                                                                                                                                                                                                                                                                                                                                                                                                                                                                                                                                                                                                                                                                                     |                                                                                                                                                                                            |            |       |                   |                                  |             |                                                                                                                                                                                            |            |             |      |  |  |                     |    |  |  |          |    |     |  |                  |      |     |      |                                        |  |  |  |  |             |                |            |             |      |  |  |                     |    |  |  |          |     |     |  |                  |      |     |      |                                                  |  |  |  |  |             |                |            |             |      |  |  |                     |    |  |  |          |     |     |  |                  |      |     |      |                                                 |  |  |  |  |             |                |            |             |      |  |  |                     |    |  |  |          |     |     |  |                  |      |     |      |                                                                                                                                                                                            |
| Drug administration                                                                                                     | 60                                                                                                                                                                                                                                                                                                                                                                                                                                                                                                                                                                                                                                                                                                                                                                                                                                                                                                                                                                                                                                                                                                                                                                                                                                                                                                                                                                                                                                                                                                                                                                                                                                                                                                                                                                                                                                                                                                       |                                                                                                                                                                                            |            |       |                   |                                  |             |                                                                                                                                                                                            |            |             |      |  |  |                     |    |  |  |          |    |     |  |                  |      |     |      |                                        |  |  |  |  |             |                |            |             |      |  |  |                     |    |  |  |          |     |     |  |                  |      |     |      |                                                  |  |  |  |  |             |                |            |             |      |  |  |                     |    |  |  |          |     |     |  |                  |      |     |      |                                                 |  |  |  |  |             |                |            |             |      |  |  |                     |    |  |  |          |     |     |  |                  |      |     |      |                                                                                                                                                                                            |
| Hospital                                                                                                                | 359                                                                                                                                                                                                                                                                                                                                                                                                                                                                                                                                                                                                                                                                                                                                                                                                                                                                                                                                                                                                                                                                                                                                                                                                                                                                                                                                                                                                                                                                                                                                                                                                                                                                                                                                                                                                                                                                                                      | 647                                                                                                                                                                                        |            |       |                   |                                  |             |                                                                                                                                                                                            |            |             |      |  |  |                     |    |  |  |          |    |     |  |                  |      |     |      |                                        |  |  |  |  |             |                |            |             |      |  |  |                     |    |  |  |          |     |     |  |                  |      |     |      |                                                  |  |  |  |  |             |                |            |             |      |  |  |                     |    |  |  |          |     |     |  |                  |      |     |      |                                                 |  |  |  |  |             |                |            |             |      |  |  |                     |    |  |  |          |     |     |  |                  |      |     |      |                                                                                                                                                                                            |
| Total cost (NHS)                                                                                                        | 4132                                                                                                                                                                                                                                                                                                                                                                                                                                                                                                                                                                                                                                                                                                                                                                                                                                                                                                                                                                                                                                                                                                                                                                                                                                                                                                                                                                                                                                                                                                                                                                                                                                                                                                                                                                                                                                                                                                     | 847                                                                                                                                                                                        | 3285       |       |                   |                                  |             |                                                                                                                                                                                            |            |             |      |  |  |                     |    |  |  |          |    |     |  |                  |      |     |      |                                        |  |  |  |  |             |                |            |             |      |  |  |                     |    |  |  |          |     |     |  |                  |      |     |      |                                                  |  |  |  |  |             |                |            |             |      |  |  |                     |    |  |  |          |     |     |  |                  |      |     |      |                                                 |  |  |  |  |             |                |            |             |      |  |  |                     |    |  |  |          |     |     |  |                  |      |     |      |                                                                                                                                                                                            |
| Average costs in children with cyanotic CHD (£)                                                                         |                                                                                                                                                                                                                                                                                                                                                                                                                                                                                                                                                                                                                                                                                                                                                                                                                                                                                                                                                                                                                                                                                                                                                                                                                                                                                                                                                                                                                                                                                                                                                                                                                                                                                                                                                                                                                                                                                                          |                                                                                                                                                                                            |            |       |                   |                                  |             |                                                                                                                                                                                            |            |             |      |  |  |                     |    |  |  |          |    |     |  |                  |      |     |      |                                        |  |  |  |  |             |                |            |             |      |  |  |                     |    |  |  |          |     |     |  |                  |      |     |      |                                                  |  |  |  |  |             |                |            |             |      |  |  |                     |    |  |  |          |     |     |  |                  |      |     |      |                                                 |  |  |  |  |             |                |            |             |      |  |  |                     |    |  |  |          |     |     |  |                  |      |     |      |                                                                                                                                                                                            |
|                                                                                                                         | Palivizumab                                                                                                                                                                                                                                                                                                                                                                                                                                                                                                                                                                                                                                                                                                                                                                                                                                                                                                                                                                                                                                                                                                                                                                                                                                                                                                                                                                                                                                                                                                                                                                                                                                                                                                                                                                                                                                                                                              | No prophylaxis                                                                                                                                                                             | Difference |       |                   |                                  |             |                                                                                                                                                                                            |            |             |      |  |  |                     |    |  |  |          |    |     |  |                  |      |     |      |                                        |  |  |  |  |             |                |            |             |      |  |  |                     |    |  |  |          |     |     |  |                  |      |     |      |                                                  |  |  |  |  |             |                |            |             |      |  |  |                     |    |  |  |          |     |     |  |                  |      |     |      |                                                 |  |  |  |  |             |                |            |             |      |  |  |                     |    |  |  |          |     |     |  |                  |      |     |      |                                                                                                                                                                                            |
| Palivizumab                                                                                                             | 3714                                                                                                                                                                                                                                                                                                                                                                                                                                                                                                                                                                                                                                                                                                                                                                                                                                                                                                                                                                                                                                                                                                                                                                                                                                                                                                                                                                                                                                                                                                                                                                                                                                                                                                                                                                                                                                                                                                     |                                                                                                                                                                                            |            |       |                   |                                  |             |                                                                                                                                                                                            |            |             |      |  |  |                     |    |  |  |          |    |     |  |                  |      |     |      |                                        |  |  |  |  |             |                |            |             |      |  |  |                     |    |  |  |          |     |     |  |                  |      |     |      |                                                  |  |  |  |  |             |                |            |             |      |  |  |                     |    |  |  |          |     |     |  |                  |      |     |      |                                                 |  |  |  |  |             |                |            |             |      |  |  |                     |    |  |  |          |     |     |  |                  |      |     |      |                                                                                                                                                                                            |
| Drug administration                                                                                                     | 60                                                                                                                                                                                                                                                                                                                                                                                                                                                                                                                                                                                                                                                                                                                                                                                                                                                                                                                                                                                                                                                                                                                                                                                                                                                                                                                                                                                                                                                                                                                                                                                                                                                                                                                                                                                                                                                                                                       |                                                                                                                                                                                            |            |       |                   |                                  |             |                                                                                                                                                                                            |            |             |      |  |  |                     |    |  |  |          |    |     |  |                  |      |     |      |                                        |  |  |  |  |             |                |            |             |      |  |  |                     |    |  |  |          |     |     |  |                  |      |     |      |                                                  |  |  |  |  |             |                |            |             |      |  |  |                     |    |  |  |          |     |     |  |                  |      |     |      |                                                 |  |  |  |  |             |                |            |             |      |  |  |                     |    |  |  |          |     |     |  |                  |      |     |      |                                                                                                                                                                                            |
| Hospital                                                                                                                | 402                                                                                                                                                                                                                                                                                                                                                                                                                                                                                                                                                                                                                                                                                                                                                                                                                                                                                                                                                                                                                                                                                                                                                                                                                                                                                                                                                                                                                                                                                                                                                                                                                                                                                                                                                                                                                                                                                                      | 567                                                                                                                                                                                        |            |       |                   |                                  |             |                                                                                                                                                                                            |            |             |      |  |  |                     |    |  |  |          |    |     |  |                  |      |     |      |                                        |  |  |  |  |             |                |            |             |      |  |  |                     |    |  |  |          |     |     |  |                  |      |     |      |                                                  |  |  |  |  |             |                |            |             |      |  |  |                     |    |  |  |          |     |     |  |                  |      |     |      |                                                 |  |  |  |  |             |                |            |             |      |  |  |                     |    |  |  |          |     |     |  |                  |      |     |      |                                                                                                                                                                                            |
| Total cost (NHS)                                                                                                        | 4176                                                                                                                                                                                                                                                                                                                                                                                                                                                                                                                                                                                                                                                                                                                                                                                                                                                                                                                                                                                                                                                                                                                                                                                                                                                                                                                                                                                                                                                                                                                                                                                                                                                                                                                                                                                                                                                                                                     | 567                                                                                                                                                                                        | 3609       |       |                   |                                  |             |                                                                                                                                                                                            |            |             |      |  |  |                     |    |  |  |          |    |     |  |                  |      |     |      |                                        |  |  |  |  |             |                |            |             |      |  |  |                     |    |  |  |          |     |     |  |                  |      |     |      |                                                  |  |  |  |  |             |                |            |             |      |  |  |                     |    |  |  |          |     |     |  |                  |      |     |      |                                                 |  |  |  |  |             |                |            |             |      |  |  |                     |    |  |  |          |     |     |  |                  |      |     |      |                                                                                                                                                                                            |
| <div>Cost-effectiveness</div> <div>Is the cost small relative to the net benefits?</div>                                | <div>A recent HTA (Wang 2011) calculated the cost effectiveness for different subgroups, but the authors recognized that there is a poor quality estimates. This data showed that prophylaxis with palivizumab does not represent good value for money based on the current UK incremental cost-effectiveness ratio threshold of £30,000/QALY when used unselectively in children without CLD/CHD or children with CLD or CHD. In summary, the cost effective subgroups (&lt; £30,000/QALY) for children who had no CLD or CHD must contain at least two other risk factors apart from Gestational age and birth age. The cost-effective subgroups for children who had CLD or CHD do not necessarily need to have any other risk factors.</div>                                                                                                                                                                                                                                                                                                                                                                                                                                                                                                                                                                                                                                                                                                                                                                                                                                                                                                                                                                                                                                                                                                                                                         | <div><div>Yes</div><div>Uncertain</div><div>No</div></div> <div><div><input type="checkbox"/></div><div><input checked="" type="checkbox"/></div><div><input type="checkbox"/></div></div> |            |       |                   |                                  |             |                                                                                                                                                                                            |            |             |      |  |  |                     |    |  |  |          |    |     |  |                  |      |     |      |                                        |  |  |  |  |             |                |            |             |      |  |  |                     |    |  |  |          |     |     |  |                  |      |     |      |                                                  |  |  |  |  |             |                |            |             |      |  |  |                     |    |  |  |          |     |     |  |                  |      |     |      |                                                 |  |  |  |  |             |                |            |             |      |  |  |                     |    |  |  |          |     |     |  |                  |      |     |      |                                                                                                                                                                                            |
| <div>Feasibility</div> <div>Is it feasible to avoid any administrative constraints and to ensure appropriate use?</div> | <div>Possible difficulties in professional acceptability due to the large variability in prescribing palivizumab on the basis of the risk factors that can make the children eligible for the prophylaxis, the uncertainties related to the initiation and termination of immunoprophylaxis and the correct definition of the risks of the prognostic factors for hospital admission due to RSV infection.</div> <div>Possible organisational impact in case of hospital –based instead of home –based palivizumab administration to all of the possible children eligible for prophylaxis.</div>                                                                                                                                                                                                                                                                                                                                                                                                                                                                                                                                                                                                                                                                                                                                                                                                                                                                                                                                                                                                                                                                                                                                                                                                                                                                                                        | <div><div>Yes</div><div>Uncertain</div><div>No</div></div> <div><div><input type="checkbox"/></div><div><input checked="" type="checkbox"/></div><div><input type="checkbox"/></div></div> |            |       |                   |                                  |             |                                                                                                                                                                                            |            |             |      |  |  |                     |    |  |  |          |    |     |  |                  |      |     |      |                                        |  |  |  |  |             |                |            |             |      |  |  |                     |    |  |  |          |     |     |  |                  |      |     |      |                                                  |  |  |  |  |             |                |            |             |      |  |  |                     |    |  |  |          |     |     |  |                  |      |     |      |                                                 |  |  |  |  |             |                |            |             |      |  |  |                     |    |  |  |          |     |     |  |                  |      |     |      |                                                                                                                                                                                            |
| <div>Equity</div> <div>Would inequities be reduced?</div>                                                               | <div>The intervention might only be available to those able to pay if it is not covered by insurance/NHS.</div>                                                                                                                                                                                                                                                                                                                                                                                                                                                                                                                                                                                                                                                                                                                                                                                                                                                                                                                                                                                                                                                                                                                                                                                                                                                                                                                                                                                                                                                                                                                                                                                                                                                                                                                                                                                          | <div><div>Yes</div><div>Uncertain</div><div>No</div></div> <div><div><input type="checkbox"/></div><div><input checked="" type="checkbox"/></div><div><input type="checkbox"/></div></div> |            |       |                   |                                  |             |                                                                                                                                                                                            |            |             |      |  |  |                     |    |  |  |          |    |     |  |                  |      |     |      |                                        |  |  |  |  |             |                |            |             |      |  |  |                     |    |  |  |          |     |     |  |                  |      |     |      |                                                  |  |  |  |  |             |                |            |             |      |  |  |                     |    |  |  |          |     |     |  |                  |      |     |      |                                                 |  |  |  |  |             |                |            |             |      |  |  |                     |    |  |  |          |     |     |  |                  |      |     |      |                                                                                                                                                                                            |

| Your view of the balance of desirable and undesirable consequences of the intervention                                                                  | Yes                                                              | Probably                                                          | Don't know                                 | Probably not                                                      | No                                                               |
|---------------------------------------------------------------------------------------------------------------------------------------------------------|------------------------------------------------------------------|-------------------------------------------------------------------|--------------------------------------------|-------------------------------------------------------------------|------------------------------------------------------------------|
|                                                                                                                                                         | Desirable consequences clearly outweigh undesirable consequences | Desirable consequences probably outweigh undesirable consequences | Consequences equally balanced or uncertain | Undesirable consequences probably outweigh desirable consequences | Undesirable consequences clearly outweigh desirable consequences |
| Decision                                                                                                                                                | Yes                                                              | Coverage with evidence development                                |                                            | No                                                                |                                                                  |
|                                                                                                                                                         |                                                                  |                                                                   |                                            |                                                                   |                                                                  |
| <b>Justification</b><br>(reason for deciding the intervention should be covered, covered with evidence development or not covered)                      |                                                                  |                                                                   |                                            |                                                                   |                                                                  |
| <b>Implementation</b><br>(details regarding the decision, including any restrictions on coverage and conditions for coverage with evidence development) |                                                                  |                                                                   |                                            |                                                                   |                                                                  |

## References

- 1) Wang D, Bayliss S, Meads C. Palivizumab for immunoprophylaxis of respiratory syncytial virus (RSV) bronchiolitis in high-risk infants and young children: a systematic review and additional economic modelling of subgroup analyses. *Health Technol Assess* 2011;15(5).
- 2) Robinson KA, Odelola OA, Saldanha I, Mckoy N. Palivizumab for prophylaxis against respiratory syncytial virus infection in children with cystic fibrosis. *Cochrane Database of Systematic Reviews* 2010, Issue 2.
